# Supplementary material
Source: publisher figshare collection journal article supplement (https://acs.figshare.com/ndownloader/files/9546685)
Supplement: Supplementary file 1 [file 9546685]

Product release mechanism associated with structural changes in  
monomeric L-threonine 3-dehydrogenase

**Tomoharu Motoyama<sup>‡, ¶, 1</sup>, Shogo Nakano<sup>‡, ¶, 1\*</sup>, Yuta Yamamoto<sup>#</sup>, Hiroaki Tokiwa<sup>#, †</sup>,  
Yasuhisa Asano<sup>§, ¶</sup>, and Sohei Ito<sup>‡, ¶</sup>**

<sup>‡</sup>Graduate Division of Nutritional and Environmental Sciences, University of Shizuoka, 52-1  
Yada, Suruga-ku, Shizuoka 422-8526, Japan

<sup>§</sup>Biotechnology Research Center and Department of Biotechnology, Toyama Prefectural  
University, 5180 Kurokawa, Imizu, Toyama 939-0398, Japan

<sup>#</sup>Department of Chemistry, Rikkyo University, Nishi-ikebukuro, Toshimaku, Tokyo 171-8501,  
Japan

<sup>†</sup>Research Center of Smart Molecules, Rikkyo University, Nishi-ikebukuro, Toshimaku, Tokyo  
171-8501, Japan

<sup>¶</sup>Asano Active Enzyme Molecule Project, ERATO, JST, 5180 Kurokawa, Imizu, Toyama 939-  
0398, Japan

<sup>1</sup>These authors contributed equally to this work.

\*To whom correspondence may be addressed: School of Food and Nutritional Sciences,  
University of Shizuoka, 52-1 Yada, Suruga-ku, Shizuoka 422-8526, Japan, Tel.: +81-54-264-5578  
(Ext.); Fax: +81-54-264-5578, E-mail: snakano@u-shizuoka-ken.ac.jp

## Supporting Information

### Figure Legends

**Figure S1, Structures at crystal packing interface of mtTDH binary form.** Residues (Y263, N72) in mtTDH binary form (green) interacts with residues (H40' and N38') in another ASU in the crystals.

**Figure S2, Plots of time-dependent change of RMSD value (a) and root mean square fluctuation (RMSF) values (b) for C $\alpha$  atoms of mtTDH L-Ser soaked form.** RMSF data were calculated utilizing all trajectory data (total 50000 structures). The RMSF values at 72-80 and 171-178 regions were colored by red. **c), Structure comparison between the initial (0 nsec, c) and final (50 nsec, d) states of MD simulation.** With the progress of the MD simulation, structure of mtTDH is changed from closed state to open state. Conformation change at 72-80 and 171-178 regions is observed as well as the MD simulation in CnTDH.

**Figure S3, Fragmentation of NADH molecule.** NADH molecule was divided into three fragments. The cutoff points were represented as wavy line.

**Table S1, Designed oligonucleotides used to prepare site-directed variants of mtTDH.**

| Primer | Comments <sup>a</sup>                                 |
|--------|-------------------------------------------------------|
| S74A   | 5'-GCGATCCTG <b><u>GCT</u></b> GCGGCGGGTGAAAAAAC-3'   |
| S111A  | 5'-CCGTCT <b><u>GCT</u></b> ATCGCGGTTTTTCGGTCCGGAC-3' |
| Y136F  | 5'-ACCGTT <b><u>TTC</u></b> GGTATCACCAAAGTTAAAGGT-3'  |
| T177A  | 5'-TCTGGTGGT <b><u>GCC</u></b> ACCGACTACGCGGTTGAA-3'  |
| D179AN | 5'-GGTACCACC <b><u>RMCT</u></b> ACGCGGTTGAATGTAC-3'   |

<sup>a</sup> The mutated site was highlighted by bold and underline.

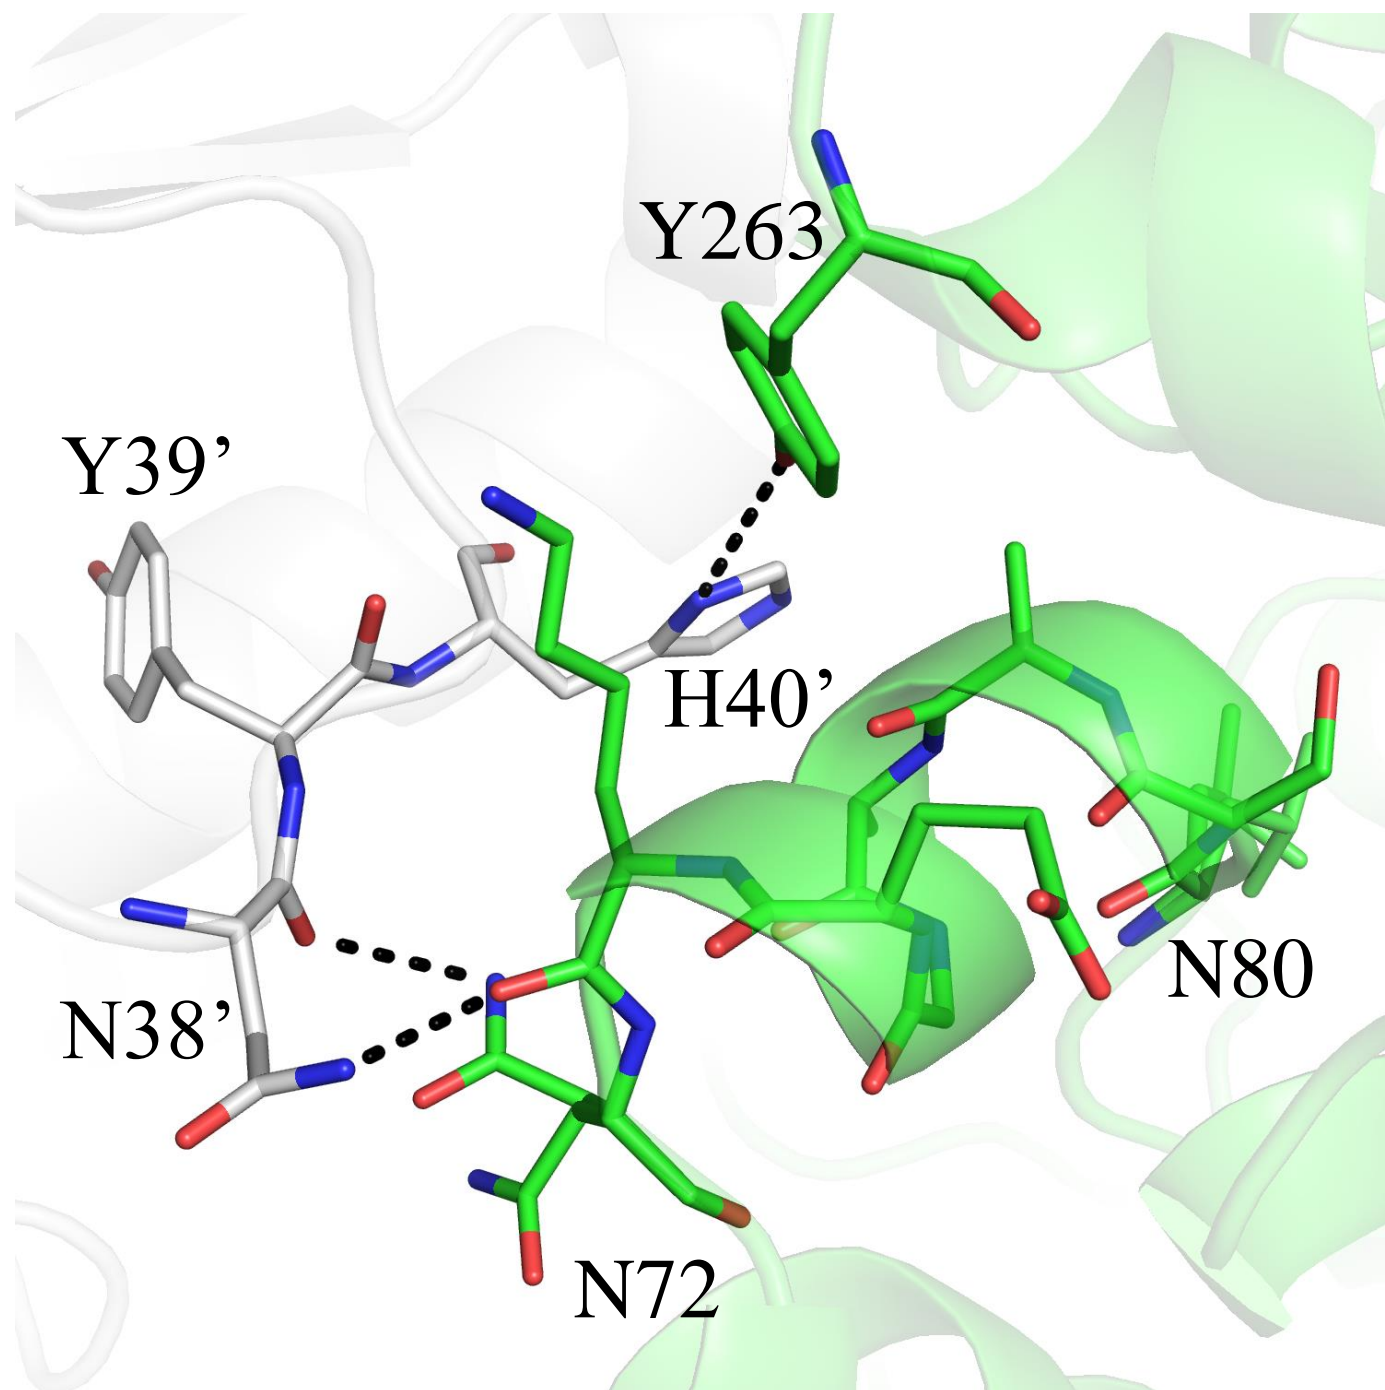

Fig. S1, Motoyama *et al.*

a,

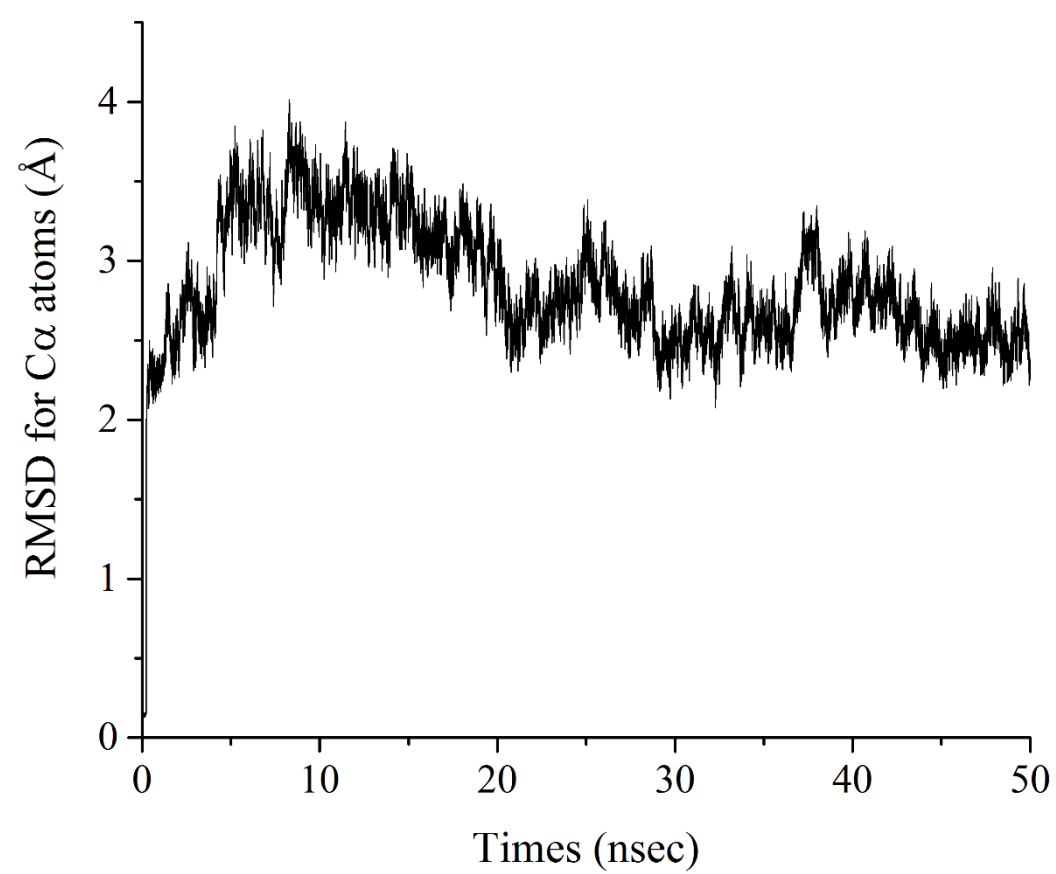

b,

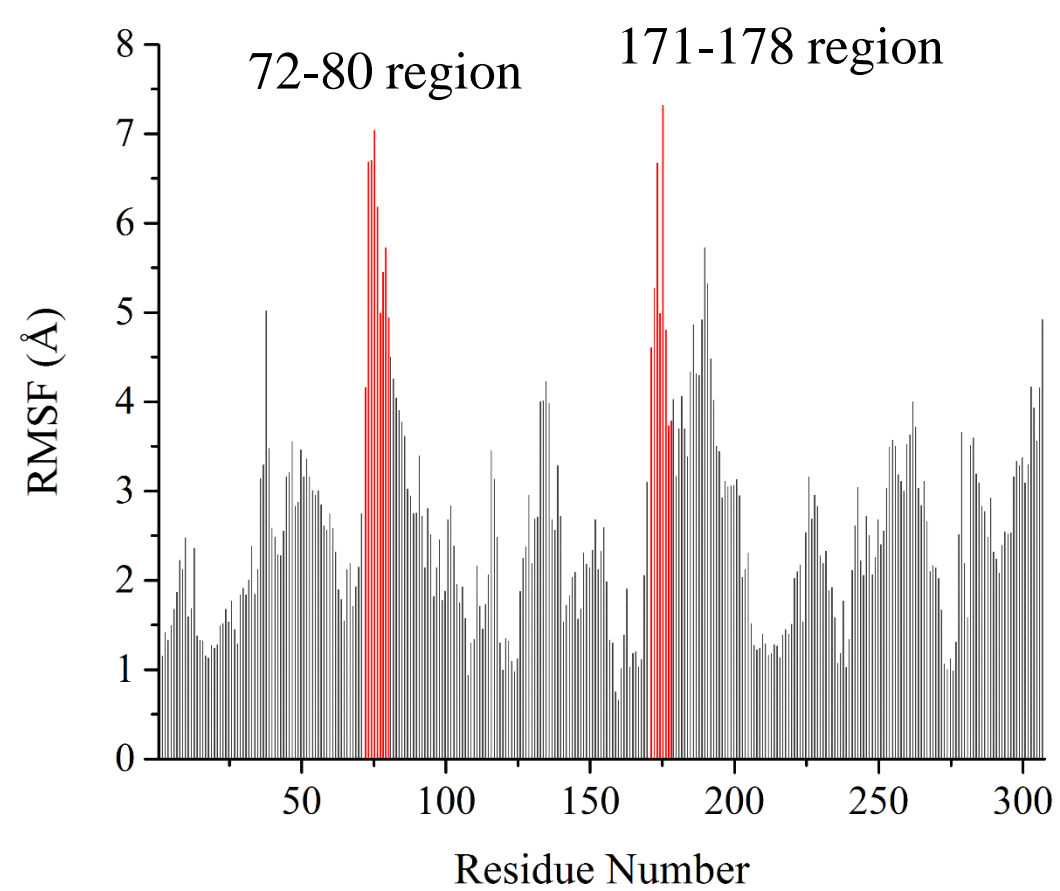

c,

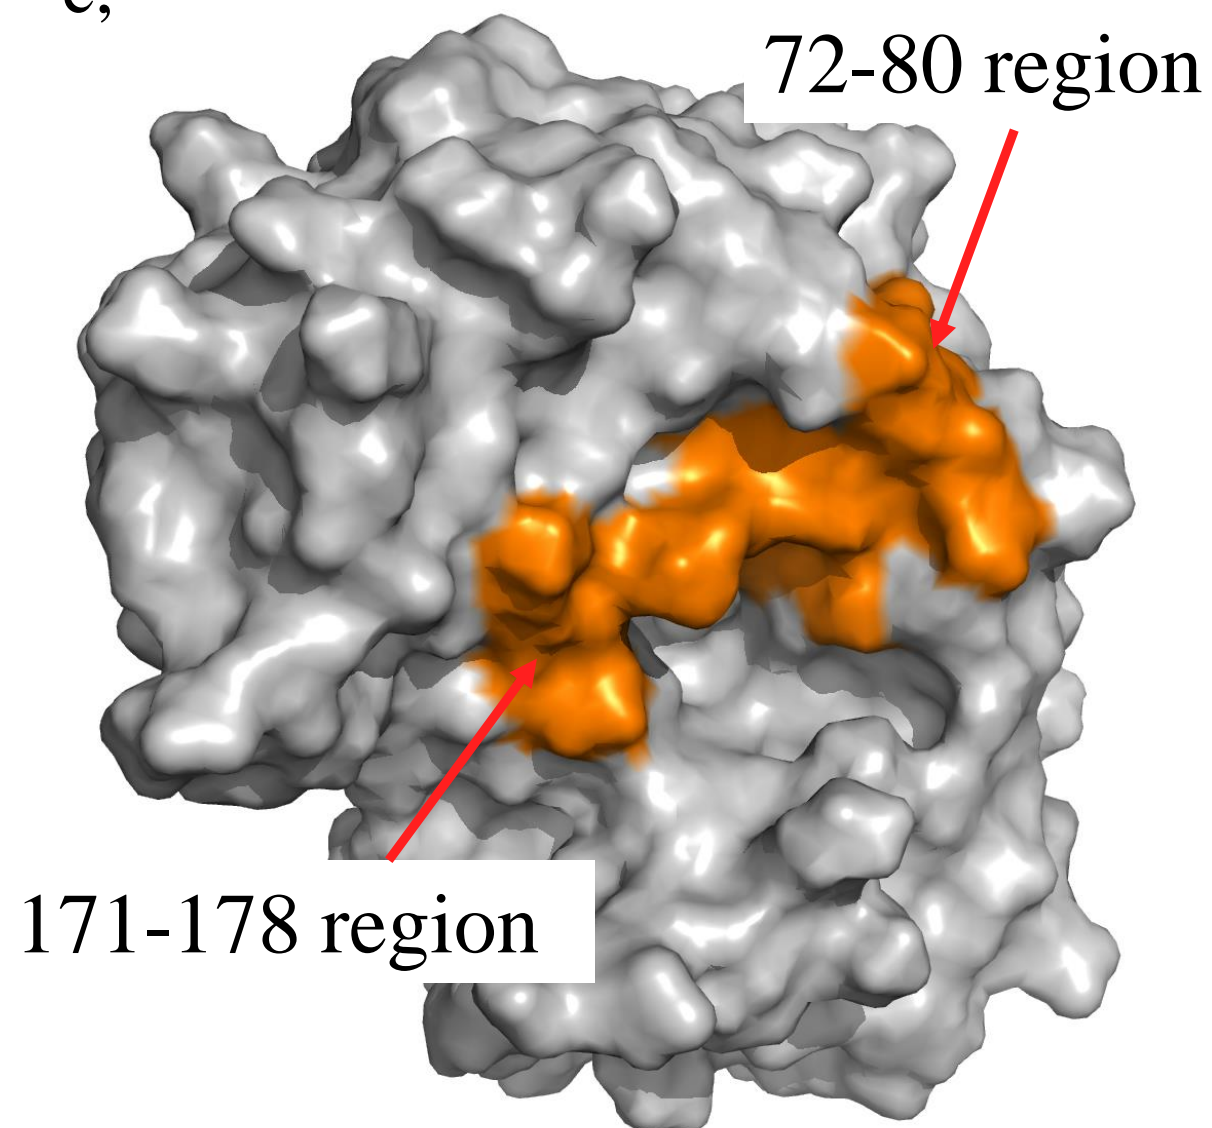

Closed state

d,

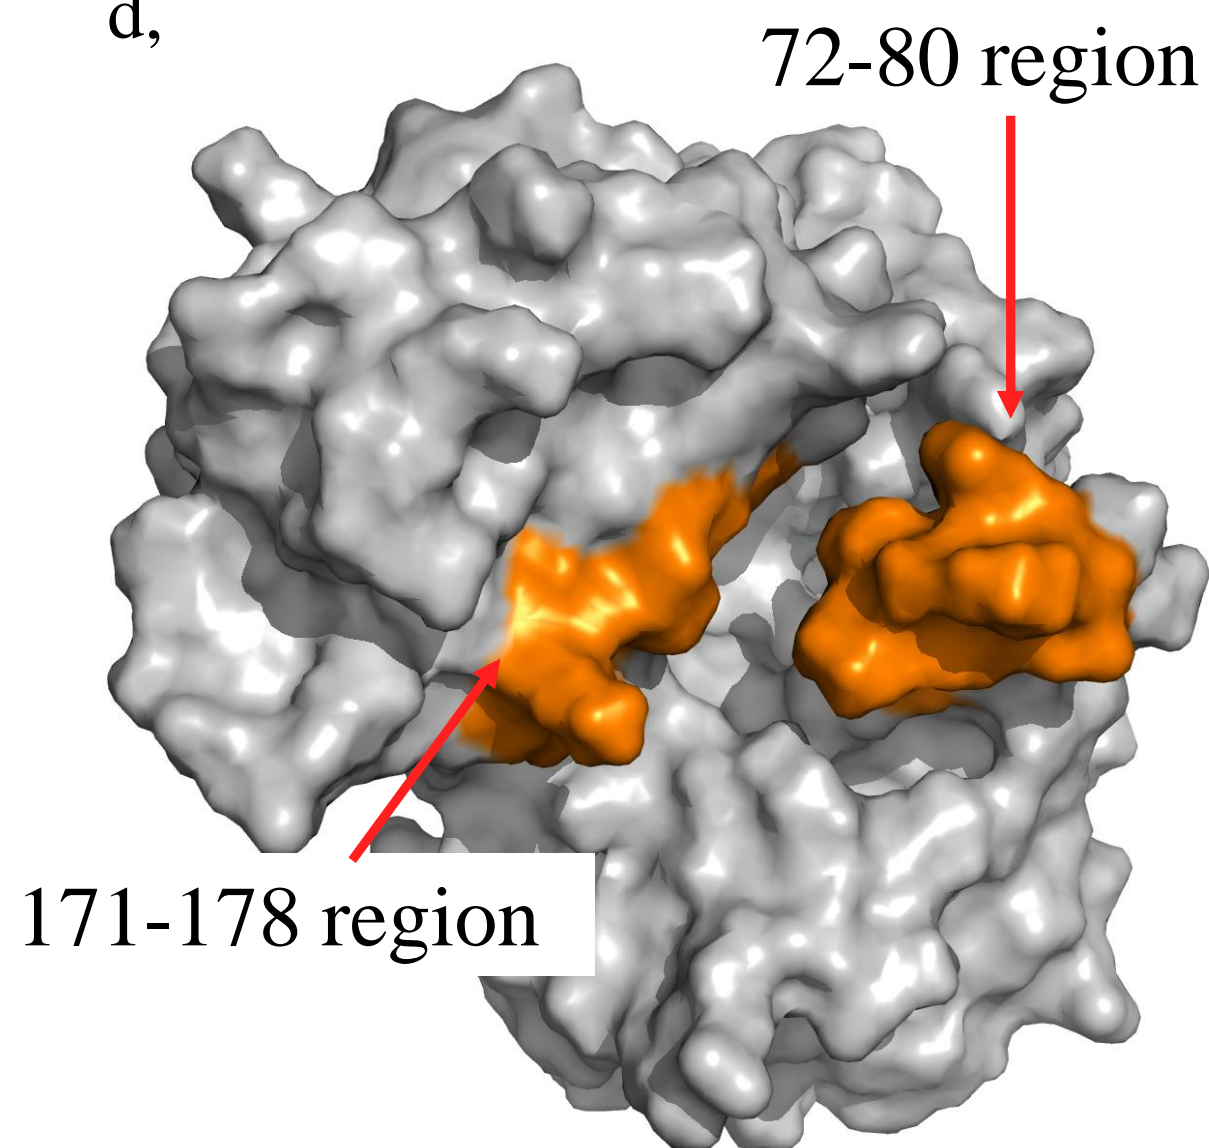

Open state

Fig. S2, Motoyama *et al.*

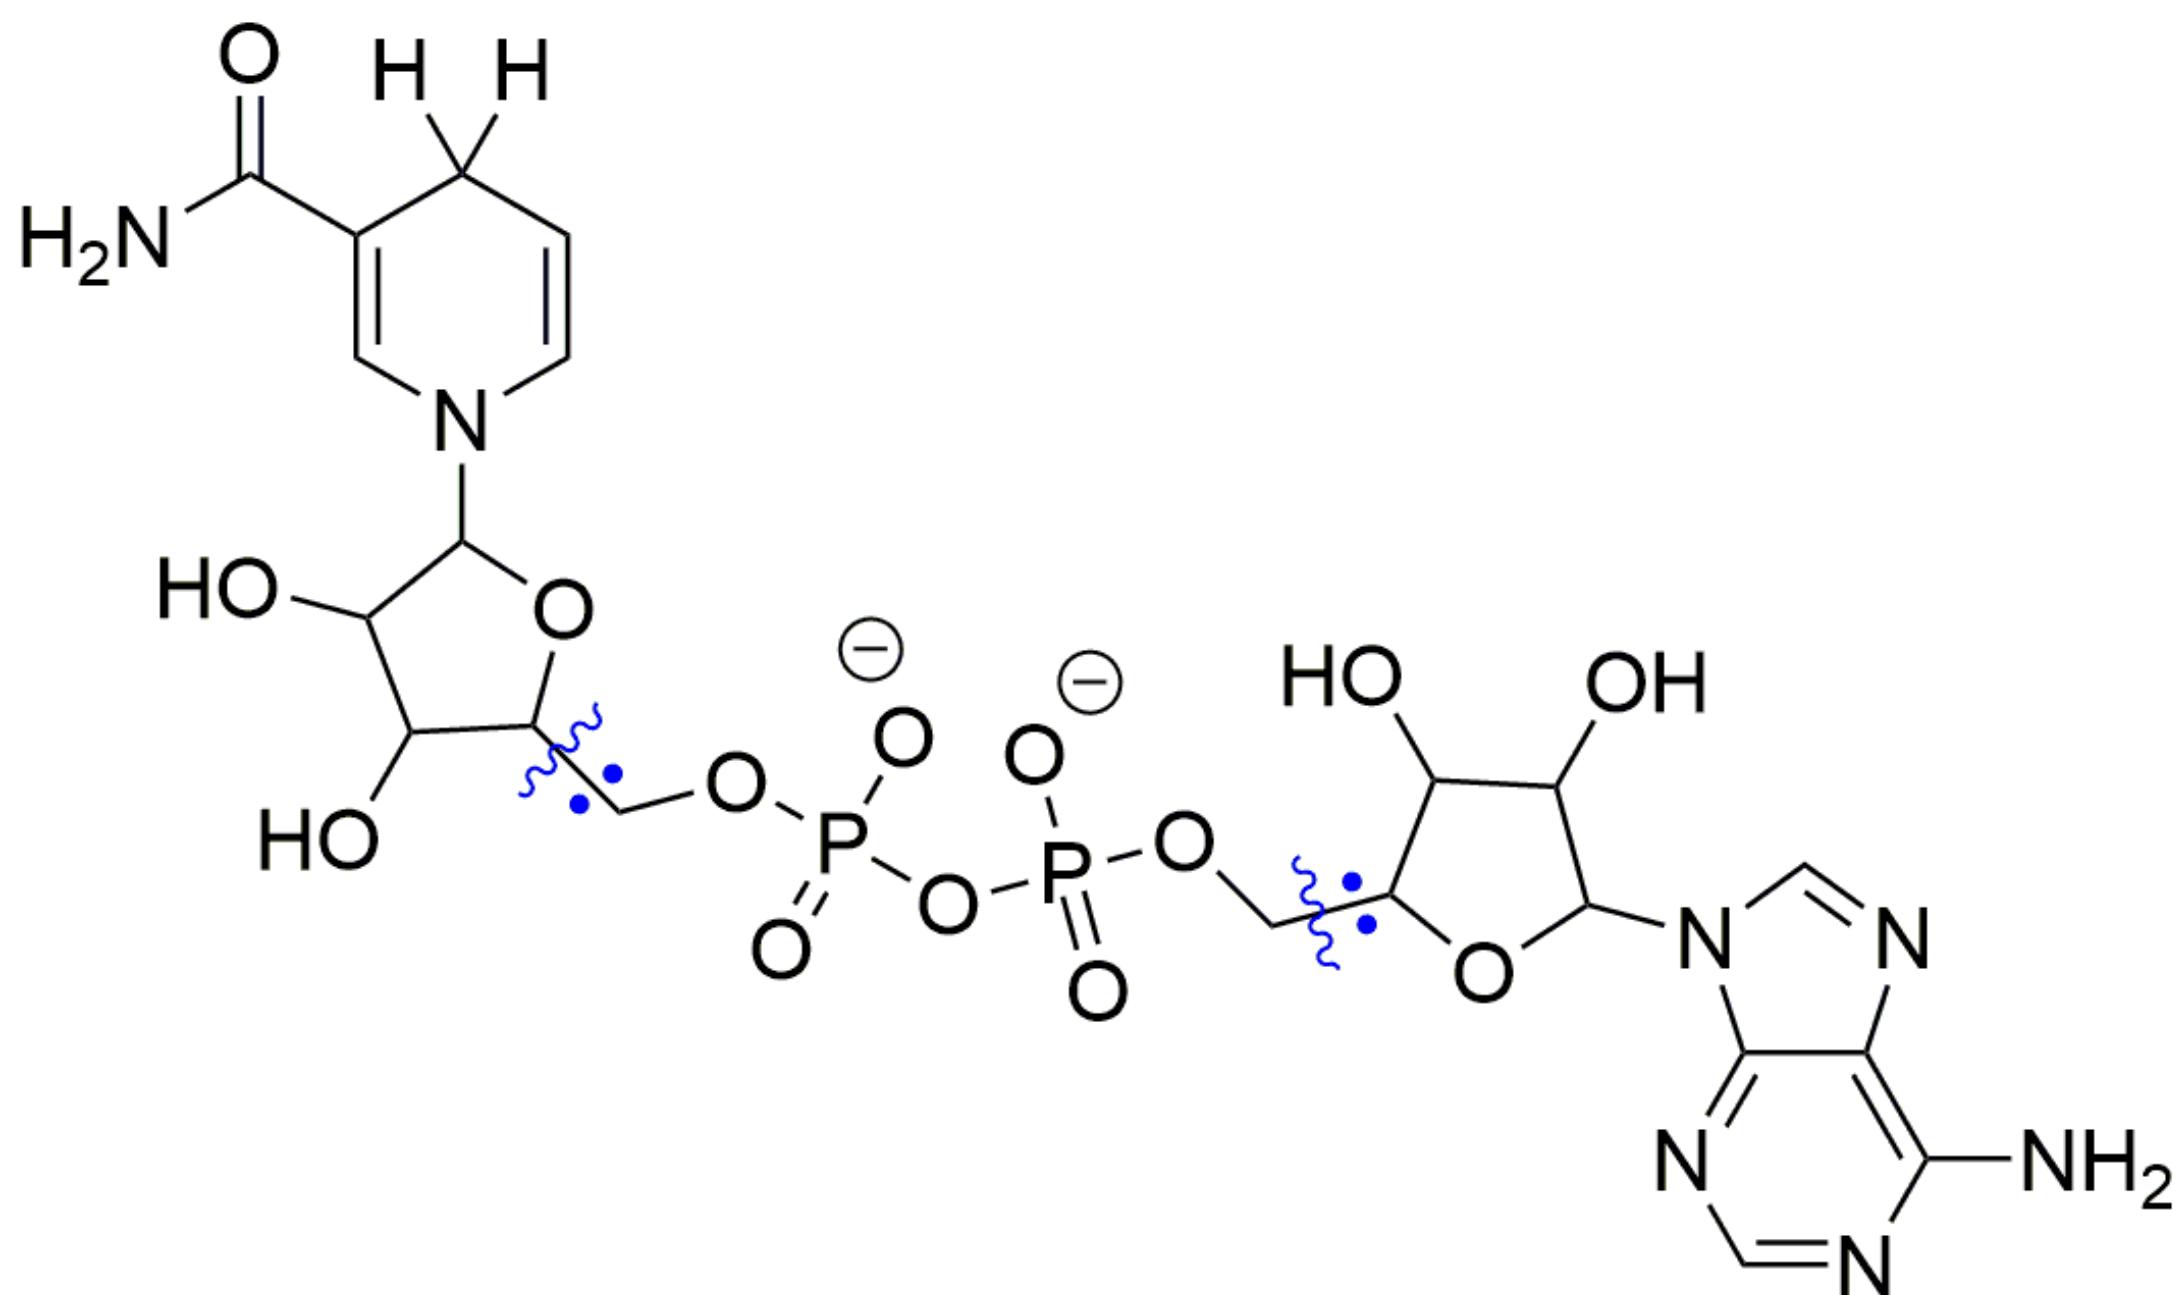

Fig. S3, Motoyama *et al.*
